# Supplementary material for: 3D-QSAR, Molecular Docking, and Molecular Dynamics Simulation Study of Thieno[3,2-b]Pyrrole-5- Carboxamide Derivatives as LSD1 Inhibitors
Source: Preprints.org preprint supplement (doi:10.20944/preprints201908.0223.v1), 2019-08-21
Supplement: Supplementary file 2 [file supplementary]

**Supplementary materials**

# 3D-QSAR, molecular docking, and molecular dynamics simulation study of thieno[3,2-b]pyrrole-5- carboxamide derivatives as LSD1 inhibitors

Yongtao Xu1,2,3, Zihao He1,2,3, Min Yang1,2,3, Hongyi Liu1,2,3, Xiaoyuan Lu1, Songjie Zhang1,2,3 , Meilan Huang4

1. School of Biomedical Engineering, Xinxiang Medical University, Xinxiang, Henan, 453003, China
2. Xinxiang key laboratory of biomedical information research
3. Henan engineering laboratory of combinatorial technique for clinical and biomedical big data
4. School of Chemistry and Chemical Engineering, Queen's University Belfast, David Keir Building, Stranmillis Road, Belfast, Northern Ireland, United Kingdom


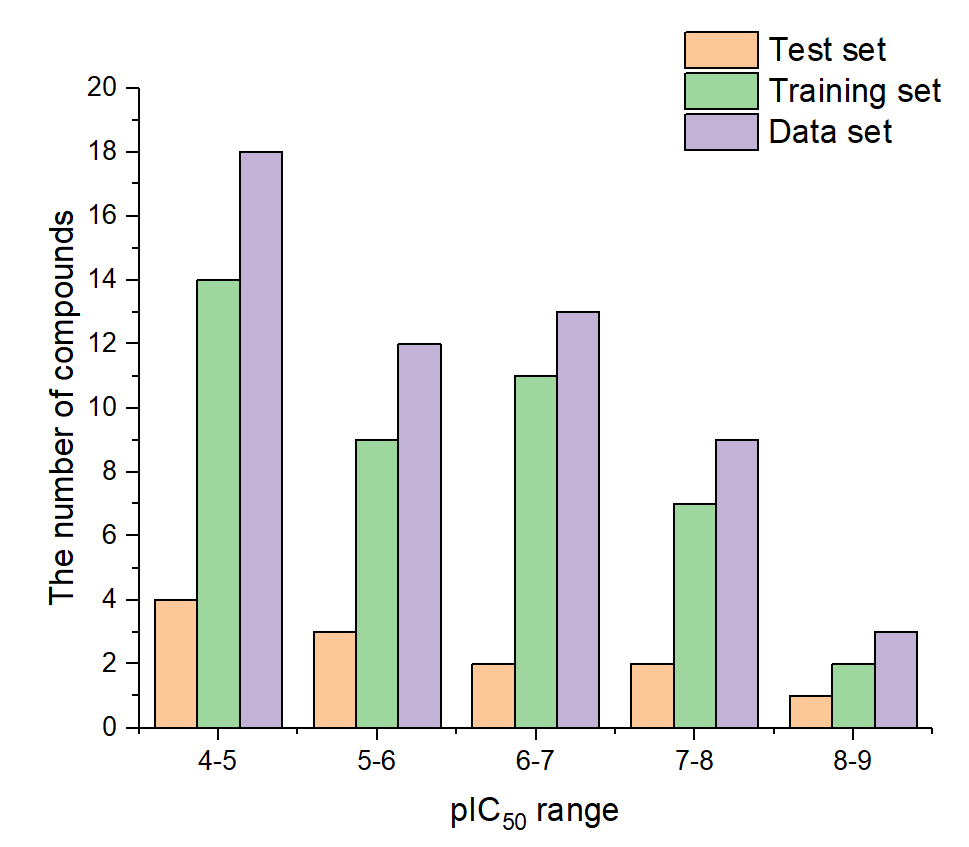


**Fig. S1**. 3D-QSAR Histogram of activity data distribution


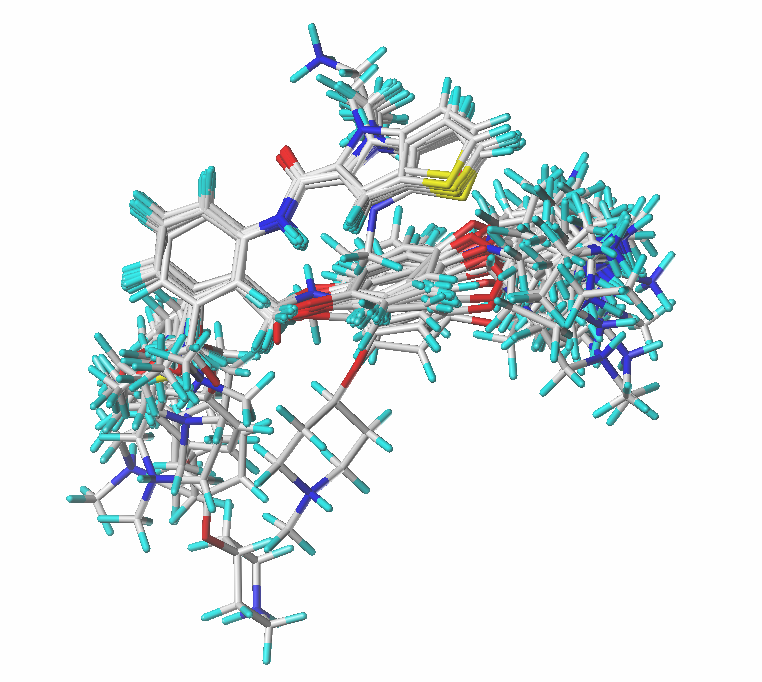


**Fig S2.** Docking-based alignment of training set compounds


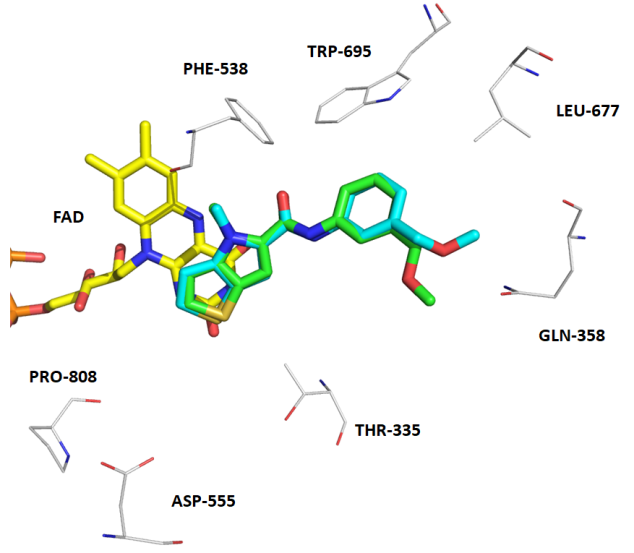

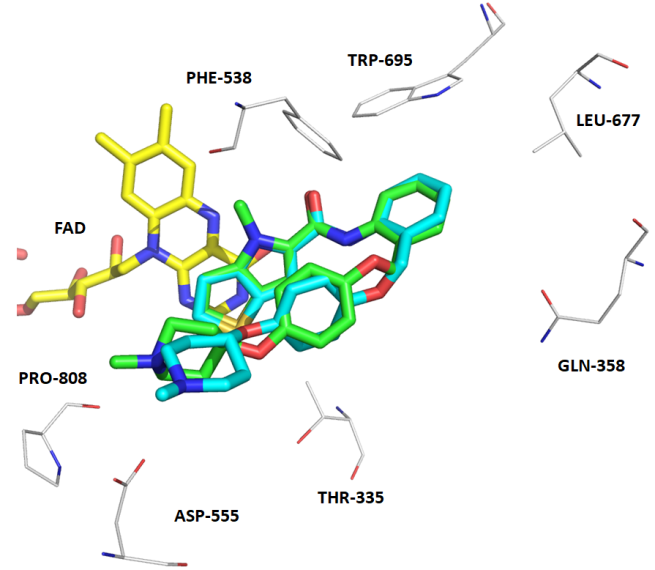


**B**

**A**


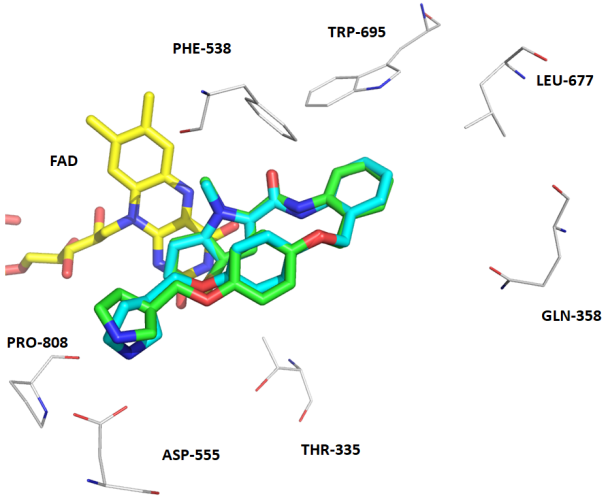

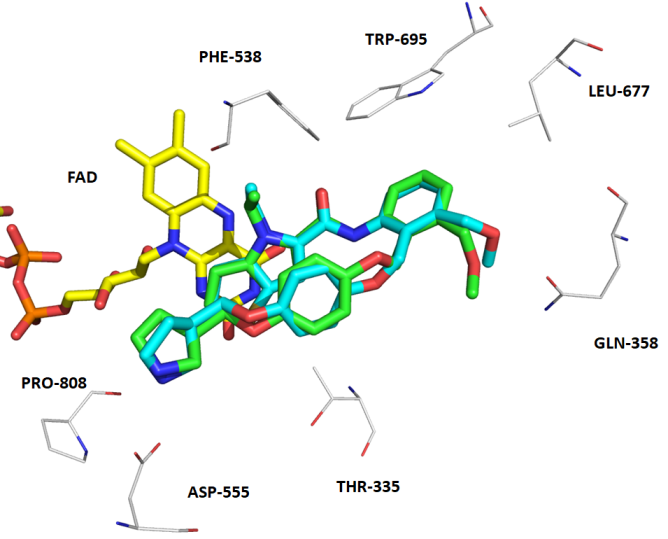

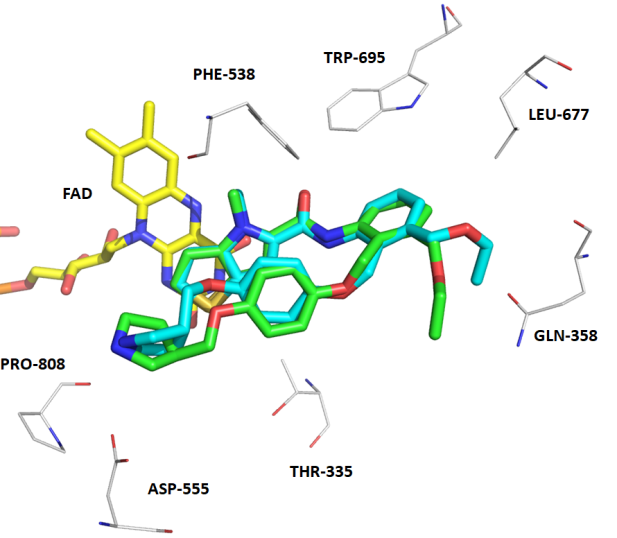


**E**

**D**

**C**

**Fig. S3**. Figures A, B, C, D, and E show the superposition of the crystal pose of the compounds (green) (PDB: 5LGN, 5LGT, 5LGU, 5LHH, 5LHI), and the docked pose of the compounds (cyan), respectively, and the FAD as a reference for orientation is shown in yellow.

**Table S1**. Randomizations of biological activity for the Y-random test.

| Random_1 | Random_2 | Random_3 | Random_4 | Random_5 | Random_6 | Random_7 | Random_8 | Random_9 | Random_10 |
| --- | --- | --- | --- | --- | --- | --- | --- | --- | --- |
| 4.873 | 6.346 | 4.166 | 5.538 | 6.171 | 8.108 | 4.318 | 8.174 | 8.174 | 4.728 |
| 4.777 | 6.209 | 6.752 | 7.745 | 6.095 | 8.174 | 4.599 | 8.108 | 7.194 | 4.873 |
| 4.599 | 6.171 | 5.538 | 5.886 | 5.886 | 7.194 | 4.281 | 7.745 | 4.166 | 6.171 |
| 4.281 | 8.174 | 7.745 | 7.252 | 8.108 | 4.166 | 4.166 | 7.194 | 4.777 | 7.187 |
| 7.535 | 4.529 | 7.194 | 7.187 | 7.745 | 4.281 | 7.194 | 6.79 | 4.411 | 5.131 |
| 7.067 | 5.658 | 5.027 | 7.18 | 7.194 | 4.599 | 8.174 | 6.752 | 4.048 | 4.599 |
| 8.174 | 5.131 | 6.355 | 7.535 | 4.728 | 4.318 | 8.108 | 6.509 | 5.032 | 4.318 |
| 8.108 | 4.873 | 4.728 | 7.067 | 7.535 | 5.032 | 5.131 | 6.355 | 4.318 | 5.032 |
| 5.602 | 4.777 | 8.108 | 5.131 | 7.067 | 4.048 | 4.873 | 5.824 | 4.599 | 4.048 |
| 5.131 | 4.599 | 6.209 | 4.873 | 5.658 | 4.411 | 4.728 | 5.658 | 4.281 | 4.411 |
| 5.658 | 4.281 | 6.171 | 7.194 | 8.174 | 4.777 | 4.668 | 5.602 | 8.108 | 4.777 |
| 6.509 | 5.027 | 6.095 | 6.917 | 5.602 | 4.654 | 4.654 | 5.538 | 4.654 | 4.654 |
| 4.166 | 5.602 | 5.886 | 6.827 | 5.538 | 4.668 | 4.777 | 5.131 | 4.668 | 6.346 |
| 6.752 | 5.538 | 7.187 | 6.68 | 6.917 | 4.728 | 4.411 | 5.032 | 4.728 | 6.68 |
| 5.824 | 7.745 | 5.658 | 6.346 | 7.252 | 4.873 | 4.048 | 5.027 | 4.873 | 6.827 |
| 5.886 | 7.18 | 5.602 | 6.209 | 7.187 | 5.131 | 5.032 | 4.873 | 5.131 | 6.917 |
| 7.252 | 7.535 | 6.346 | 8.174 | 6.209 | 5.658 | 6.752 | 4.777 | 5.658 | 4.668 |
| 7.187 | 7.067 | 4.048 | 6.171 | 6.827 | 4.529 | 5.824 | 4.728 | 4.529 | 6.752 |
| 6.917 | 4.318 | 5.032 | 6.095 | 6.68 | 4.577 | 5.658 | 4.668 | 4.577 | 6.209 |
| 6.827 | 4.728 | 4.318 | 8.108 | 6.346 | 6.509 | 5.602 | 4.654 | 6.509 | 8.108 |
| 6.68 | 4.668 | 7.18 | 4.281 | 5.658 | 6.355 | 5.538 | 4.599 | 6.68 | 8.174 |
| 6.346 | 8.108 | 7.535 | 4.411 | 5.131 | 6.79 | 7.745 | 4.577 | 6.346 | 7.194 |
| 6.209 | 6.095 | 7.067 | 4.048 | 4.281 | 4.046 | 5.027 | 4.529 | 6.209 | 4.166 |
| 7.18 | 5.886 | 8.174 | 5.032 | 5.032 | 5.027 | 4.046 | 4.411 | 6.752 | 4.281 |
| 7.194 | 7.252 | 6.917 | 5.027 | 4.318 | 7.745 | 6.79 | 4.318 | 5.824 | 7.067 |
| 4.529 | 7.187 | 4.529 | 4.166 | 7.18 | 5.538 | 6.355 | 7.535 | 5.658 | 5.886 |
| 6.171 | 4.046 | 5.658 | 4.577 | 5.027 | 5.602 | 6.509 | 7.252 | 5.602 | 6.095 |
| 6.095 | 6.79 | 5.131 | 6.509 | 4.411 | 5.658 | 4.577 | 7.187 | 5.538 | 7.252 |
| 4.411 | 6.355 | 6.509 | 4.046 | 4.048 | 5.824 | 4.529 | 7.18 | 7.745 | 7.535 |
| 4.048 | 6.509 | 4.046 | 4.318 | 6.79 | 6.752 | 5.658 | 7.067 | 5.027 | 7.18 |
| 5.032 | 7.194 | 4.411 | 5.658 | 4.668 | 6.209 | 7.18 | 6.917 | 4.046 | 5.658 |
| 4.318 | 5.824 | 4.281 | 5.602 | 4.654 | 6.346 | 7.535 | 6.827 | 6.79 | 4.529 |
| 4.728 | 5.658 | 5.824 | 6.79 | 4.577 | 6.68 | 7.252 | 6.68 | 6.355 | 4.577 |
| 4.046 | 6.752 | 6.79 | 6.355 | 4.529 | 6.827 | 7.187 | 6.346 | 6.827 | 6.509 |
| 6.79 | 6.917 | 4.577 | 6.752 | 4.046 | 6.917 | 6.171 | 6.209 | 6.917 | 6.355 |
| 6.355 | 6.827 | 4.873 | 5.824 | 4.166 | 7.067 | 6.095 | 6.171 | 7.067 | 6.79 |
| 5.538 | 6.68 | 4.777 | 4.728 | 6.752 | 5.886 | 5.886 | 6.095 | 5.886 | 4.046 |
| 7.745 | 5.032 | 4.599 | 4.668 | 4.873 | 6.095 | 7.067 | 5.886 | 6.095 | 5.027 |
| 5.658 | 4.654 | 7.252 | 4.654 | 6.355 | 6.171 | 6.917 | 5.658 | 6.171 | 7.745 |
| 5.027 | 4.577 | 6.827 | 4.777 | 6.509 | 7.187 | 6.827 | 4.281 | 7.187 | 5.538 |
| 4.668 | 4.411 | 6.68 | 4.529 | 4.777 | 7.252 | 6.68 | 4.166 | 7.252 | 5.602 |
| 4.654 | 4.048 | 4.668 | 5.658 | 4.599 | 7.535 | 6.346 | 4.048 | 7.535 | 5.658 |
| 4.577 | 4.166 | 4.654 | 4.599 | 5.824 | 7.18 | 6.209 | 4.046 | 7.18 | 5.824 |


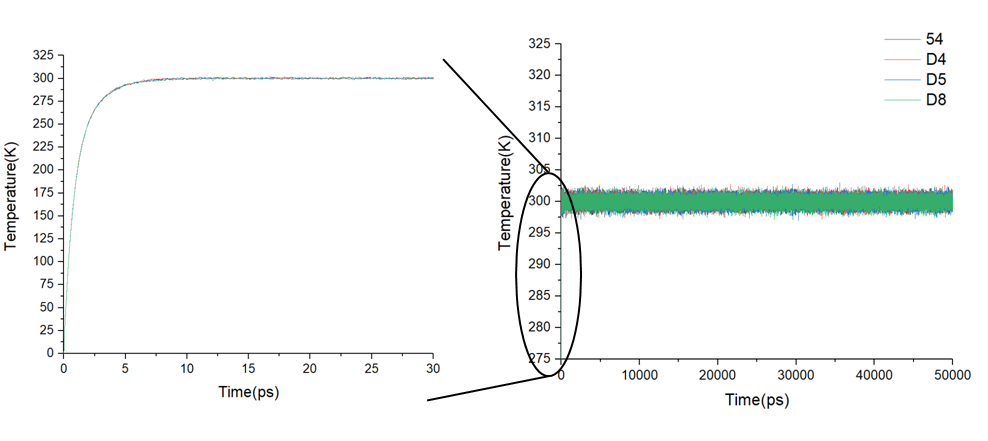


**Fig. S4**. Temperature fluctuation plot in MD


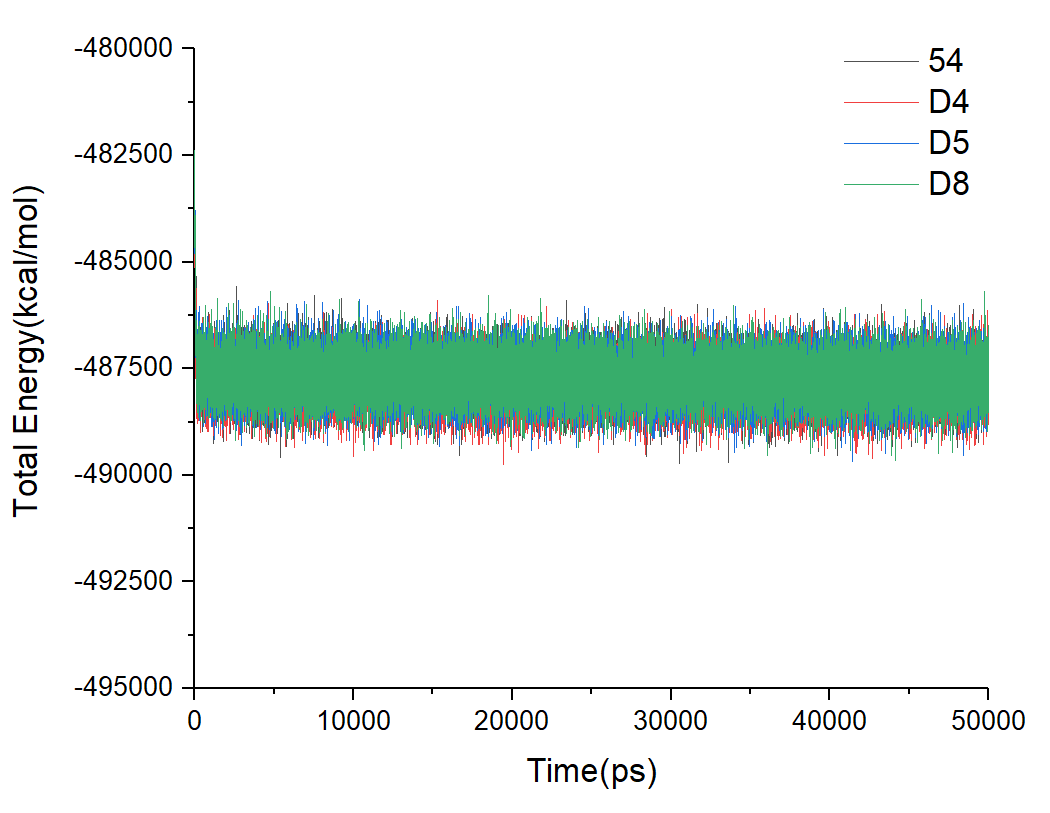


**Fig. S5**. Total energy fluctuation plot in MD


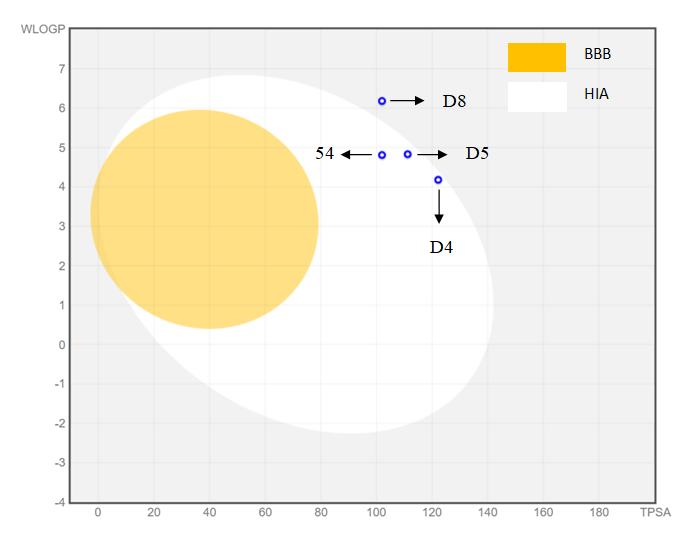


**Fig. S6**. BOILED-Egg model plot
